# Supplementary material for: Computational insights into the sorption mechanism of environmental contaminants by carbon nanoparticles through molecular dynamics simulation and density functional theory
Source: Royal Society of Chemistry journal article supplement (doi:10.1039/d0cp03459b), 2020-01-01
Supplement: d0cp03459b4.pdf [file d0cp03459b4.pdf]

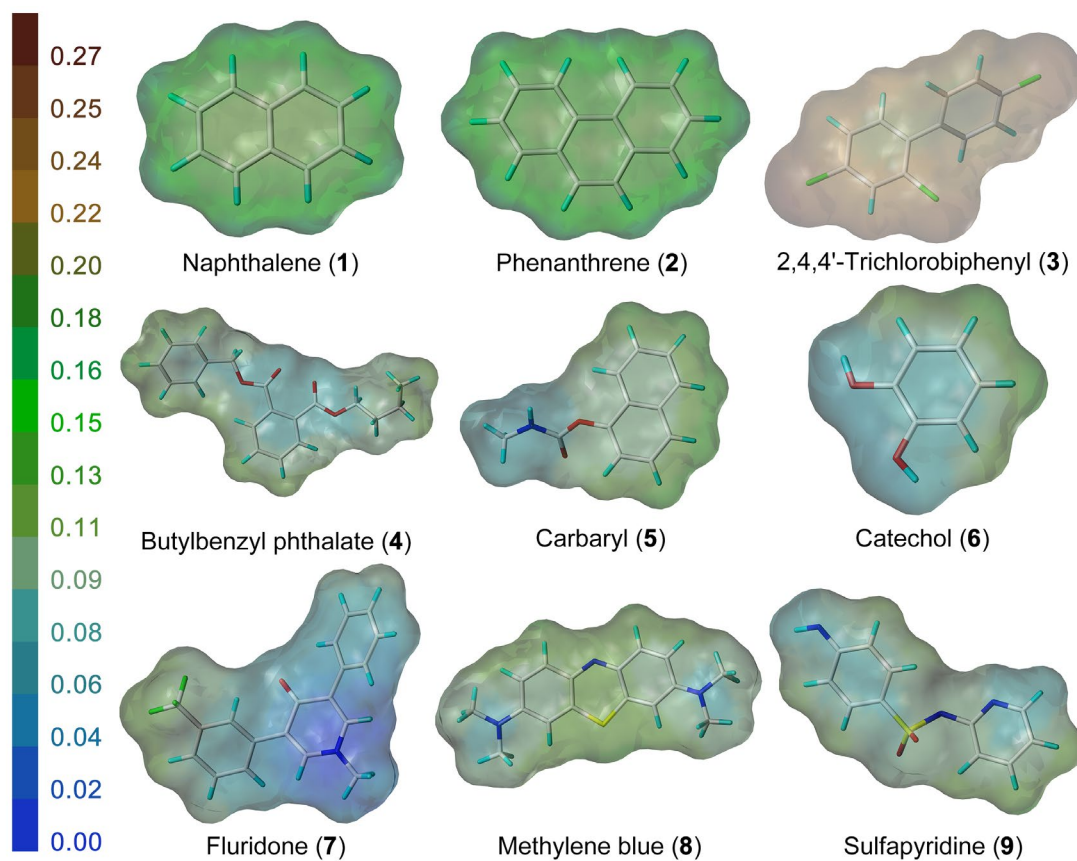

Figure S1 Lipophilic solid surfaces for the investigated compounds. Warm colors indicate lipophilic features, and cold colors indicate hydrophilic features.

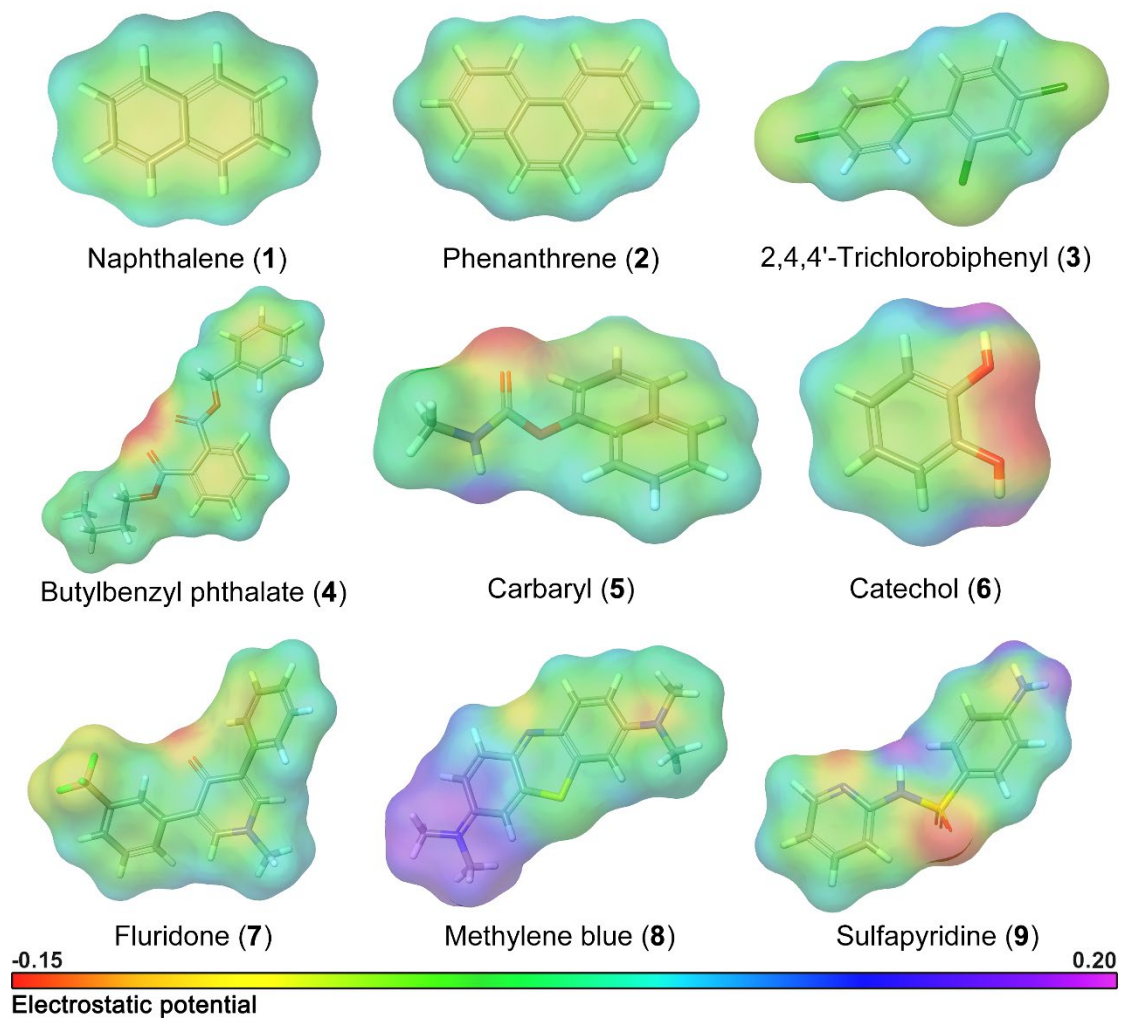

Figure S2 Electrostatic potentials for the investigated compounds. Warm colors indicate negative electrostatic potentials, and cold colors indicate positive electrostatic potentials.

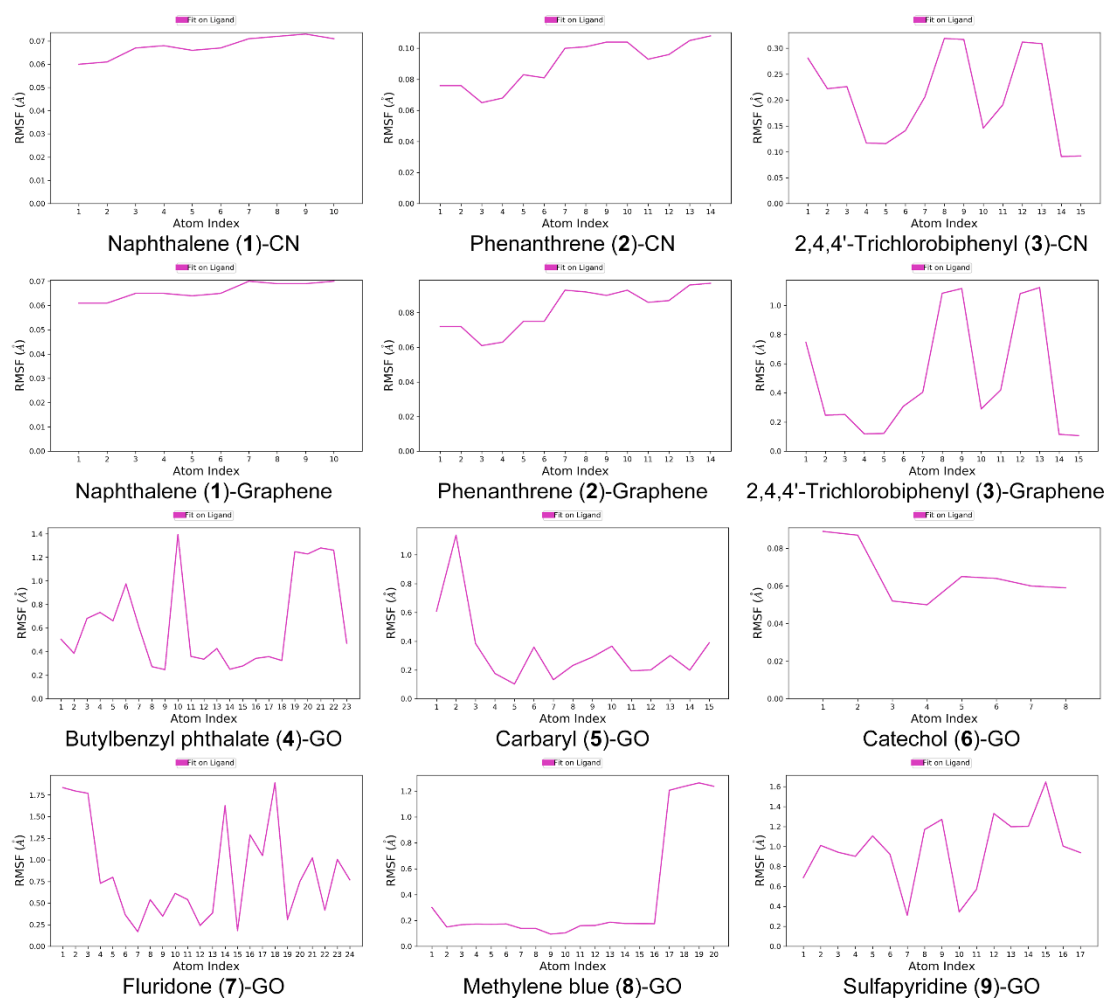

Figure S3. RMSF for the investigated environmental contaminants interacting with biochar nanocomposites during MD simulations.

Table S1 Summary of organic and microbial contaminants sorbed on various biochars and their removal mechanisms.

| Organic contaminants           | SMILES                                          | Proposed sorption mechanisms                             | PubChem CID |
|--------------------------------|-------------------------------------------------|----------------------------------------------------------|-------------|
| 1-Naphthol                     | <chem>c1cccc(c12)cccc2O</chem>                  | Partitioning and surface adsorption                      | 7005        |
| 2,4-Dichlorophenoxyacetic acid | <chem>O=C(O)COc1c(Cl)cc(Cl)cc1</chem>           | Surface adsorption                                       | 1486        |
| 2,4,4'-Trichlorobiphenyl       | <chem>c1cc(Cl)cc(Cl)c1-c2ccc(Cl)cc2</chem>      | $\pi$ - $\pi$ EDA interactions, H-bonding.               | 23448       |
| Atrazine                       | <chem>CC(C)Nc1nc(nc(n1)Cl)NCC</chem>            | Partitioning                                             | 2256        |
| Bisphenol A                    | <chem>c1cc(O)ccc1C(C)(C)c2ccc(O)cc2</chem>      | $\pi$ - $\pi$ EDA interaction and pore filling mechanism | 6623        |
| Butylbenzyl phthalate          | <chem>CCCCOC(=O)c1c(ccc1)C(=O)OCc2ccccc2</chem> | H-bonding                                                | 2347        |
| Carbamazepine                  | <chem>c1cccc(c12)N(C(=O)N)c3c(C=C2)cccc3</chem> | Hydrophobic adsorption                                   | 2554        |
| Carbaryl                       | <chem>CNC(=O)Oc1ccc(c12)cccc2</chem>            | Hydrophobic and $\pi$ - $\pi$ EDA interactions.          | 6129        |
| Catechol                       | <chem>Oc1c(O)cccc1</chem>                       | Pore-filling and diffusion                               | 289         |
| Diazinon                       | <chem>CC(C)c1nc(C)cc(n1)OP(=S)(OCC)OCC</chem>   | H-bonding with polar groups                              | 3017        |
| Dibutyl phthalate              | <chem>CCCCOC(=O)c1c(ccc1)C(=O)OCCCC</chem>      | H-bonding                                                | 3026        |

|                   |                                                                         |                                                                          |         |
|-------------------|-------------------------------------------------------------------------|--------------------------------------------------------------------------|---------|
| Diclofenac        | <chem>c1cccc(c1CC(=O)O)Nc2c(Cl)cccc2Cl</chem>                           | Hydrophobic adsorption                                                   | 3033    |
| Diethyl phthalate | <chem>CCOC(=O)c1c(C(=O)OCC)cccc1</chem>                                 | $\pi$ - $\pi$ EDA interactions.                                          | 6781    |
| Ethinylestradiol  | <chem>C#C[C@]1(O)C[C@H]([C@@]12C)[C@H]3[C@H](CC2)c4c(C3)cc(O)cc4</chem> | Pore-filling                                                             | 5991    |
| Fluridone         | <chem>FC(F)(F)c1cc(ccc1)-c2c(=O)c(cnc2)-c3ccccc3</chem>                 | Partitioning on amorphous-C                                              | 43079   |
| Ibuprofen         | <chem>O=C(O)[C@H](C)c1ccc(cc1)CC(C)C</chem>                             | Hydrophobic adsorption and $\pi$ - $\pi$ EDA interactions                | 3672    |
| Methylene blue    | <chem>CN(C)c(cc1)cc(c12)sc3c(n2)ccc(c3)=[N+](C)C</chem>                 | Electrostatic interaction, diffusion, and $\pi$ - $\pi$ EDA interactions | 4139    |
| Methylviolet      | <chem>CNc(cc1)ccc1C(c2ccc(cc2)N(C)C)=C3C=CC(C=C3)=[N+](C)C</chem>       | Electrostatic interaction                                                | 196986  |
| Naphthalene       | <chem>c1cccc(c12)cccc2</chem>                                           | Partitioning on aliphatic-C                                              | 931     |
| NDMA              | <chem>CN(C)N=O</chem>                                                   | H-bonding and hydrophobic interaction                                    | 6124    |
| Nitrobenzene      | <chem>[O-][N+](=O)c1ccccc1</chem>                                       | Pore-filling                                                             | 7416    |
| Oxamyl            | <chem>CN(C)C(=O)/C(S C)=N/OC(=O)N C</chem>                              | H-bonding with polar groups                                              | 9595287 |

|                   |                                                                                                                                    |                                              |          |
|-------------------|------------------------------------------------------------------------------------------------------------------------------------|----------------------------------------------|----------|
| p-coumaric acid   | <chem>O=C(O)/C=C/c1c<br/>cc(O)cc1</chem>                                                                                           | H-bonding                                    | 637542   |
| P-nitrotoluene    | <chem>Cc1ccc([N+](O-<br/>])=O)cc1</chem>                                                                                           | Partitioning                                 | 7473     |
| Phenanthrene      | <chem>c1cccc(c1c23)ccc<br/>2cccc3</chem>                                                                                           | $\pi$ - $\pi$ EDA interactions               | 995      |
| Phenol            | <chem>Oc1ccccc1</chem>                                                                                                             | H-bonding                                    | 996      |
| Sulfamethazine    | <chem>Cc1cc(C)nc(n1)N<br/>S(=O)(=O)c(cc2)<br/>ccc2N</chem>                                                                         | $\pi^+$ - $\pi$ EDA interactions.            | 5327     |
| Sulfamethoxazole  | <chem>Cc1cc(no1)NS(=<br/>O)(=O)c(cc2)ccc<br/>2N</chem>                                                                             | Pore-filling and<br>hydrophobic interactions | 5329     |
| Sulfapyridine     | <chem>Nc1ccc(cc1)S(=<br/>O)(=O)Nc2ccccn<br/>2</chem>                                                                               | $\pi$ - $\pi$ EDA interactions               | 5336     |
| t-Cinnamic acid   | <chem>O=C(O)/C=C/c1c<br/>cccc1</chem>                                                                                              | H-bonding                                    | 444539   |
| Tetracycline      | <chem>NC(=O)C(=C1O)<br/>C(=O)[C@@H](<br/>N(C)C)[C@@H]<br/>([C@@]12O)C[<br/>C@H]3C(C2=O)<br/>=C(O)c4c([C@@<br/>]3(C)O)cccc4O</chem> | $\pi$ - $\pi$ EDA interactions.              | 54675776 |
| Trichloroethylene | <chem>ClC(Cl)=CCl</chem>                                                                                                           | Hydrophobic adsorption                       | 6575     |

Table S2 Valence energy composed of energies of bond energy, angle energy, torsion energy, inversion energy and valence energy

| <b>ligand</b>            | <b>receptor</b> | <b>conformation</b> | <b>Valence energy (kcal/mol)</b> | <b>Bond (kcal/mol)</b> | <b>Angle (kcal/mol)</b> | <b>Torsion (kcal/mol)</b> | <b>Inversion (kcal/mol)</b> | <b>Valence energy(cross term) (kcal/mol)</b> |
|--------------------------|-----------------|---------------------|----------------------------------|------------------------|-------------------------|---------------------------|-----------------------------|----------------------------------------------|
| 2,4,4'-Trichlorobiphenyl | carbon nanotube | 1 of 1              | 0                                | 0                      | -0.001                  | 0                         | 0                           | 0                                            |
| 2,4,4'-Trichlorobiphenyl | graphene        | 1 of 4              | 0                                | 0.001                  | 0                       | -0.001                    | 0                           | 0                                            |
| 2,4,4'-Trichlorobiphenyl | graphene        | 2 of 4              | 0.001                            | -0.001                 | 0                       | 0                         | 0                           | 0                                            |
| 2,4,4'-Trichlorobiphenyl | graphene        | 3 of 4              | 0                                | 0                      | 0                       | 0                         | 0.001                       | 0                                            |
| 2,4,4'-Trichlorobiphenyl | graphene        | 4 of 4              | 0.001                            | 0                      | -0.001                  | 0                         | 0.001                       | 0                                            |
| Butyl benzyl phthalate   | graphene oxide  | 1 of 1              | 0                                | 0                      | 0.001                   | 0                         | -0.001                      | 0.001                                        |

Table S3 Non-bond energy composed of van der Waals and Electrostatic energies

| <b>Ligand</b>            | <b>Receptor</b> | <b>Conformation</b> | <b>Non-bond energy (kcal/mol)</b> | <b>Van der Waals (kcal/mol)</b> | <b>Electrostatic (kcal/mol)</b> |
|--------------------------|-----------------|---------------------|-----------------------------------|---------------------------------|---------------------------------|
| 2,4,4'-Trichlorobiphenyl | carbon nanotube | 1 of 1              | -50.02                            | -46.579                         | -3.441                          |
| 2,4,4'-Trichlorobiphenyl | graphene        | 1 of 4              | -28.52                            | -26.711                         | -1.809                          |
| 2,4,4'-Trichlorobiphenyl | graphene        | 2 of 4              | -30.139                           | -27.278                         | -2.86                           |
| 2,4,4'-Trichlorobiphenyl | graphene        | 3 of 4              | -28.731                           | -25.827                         | -2.905                          |
| 2,4,4'-Trichlorobiphenyl | graphene        | 4 of 4              | -29.25                            | -24.99                          | -4.26                           |
| Butyl benzyl phthalate   | graphene oxide  | 1 of 1              | -63.282                           | -36.938                         | -26.344                         |
